# Supplementary material
Source: PubMed Central journal article supplement (PMC2391210)
Supplement: rsbl20070337s27.pdf [file rsbl20070337s27.pdf]

**Supplementary Table.** Age; Verbal, Performance and Full IQs; and Scores on the Japanese version of the Autism Screening Questionnaire (ASQ-J) of IQ-matched subgroups of participants

|                | Group         |      |             |      |
|----------------|---------------|------|-------------|------|
|                | ASD ( n = 16) |      | TD (n = 16) |      |
|                | M             | SD   | M           | SD   |
| Age (years)    | 11.9          | 2.2  | 11.1        | 2.3  |
| Range          | 7.6 – 15.1    |      | 8.0 – 14.9  |      |
| Verbal IQ      | 99.3          | 22.8 | 106.8       | 12.6 |
| Range          | 70 – 136      |      | 88 – 124    |      |
| Performance IQ | 91.8          | 20.4 | 92.1        | 14.8 |
| Range          | 64-124        |      | 70-124      |      |
| Full IQ        | 95.5          | 20.5 | 99.4        | 11.5 |
| Range          | 70 – 127      |      | 85 – 124    |      |
| ASQ-J          | 23.3          | 5.2  | 2.3         | 2.5  |
| Range          | 16 – 33       |      | 0 – 9       |      |

ASD: children with Autism Spectrum Disorders, TD: Typically Developing children, IQ: Intelligence Quotient
